# Supplementary material for: IL-7R signaling activates widespread VH and DH gene usage to drive antibody diversity in bone marrow B cells
Source: PubMed Central journal article supplement (PMC8293627; doi:10.1016/j.celrep.2021.109349), 2021-07-13
Supplement: mmc1.pdf [file mmc1.pdf]

**Cell Reports, Volume 36**

**Supplemental information**

**IL-7R signaling activates widespread**

**V<sub>H</sub> and D<sub>H</sub> gene usage to drive**

**antibody diversity in bone marrow B cells**

**Amanda Baizan-Edge, Bryony A. Stubbs, Michael J.T. Stubbington, Daniel J. Bolland, Kristina Tabbada, Simon Andrews, and Anne E. Corcoran**

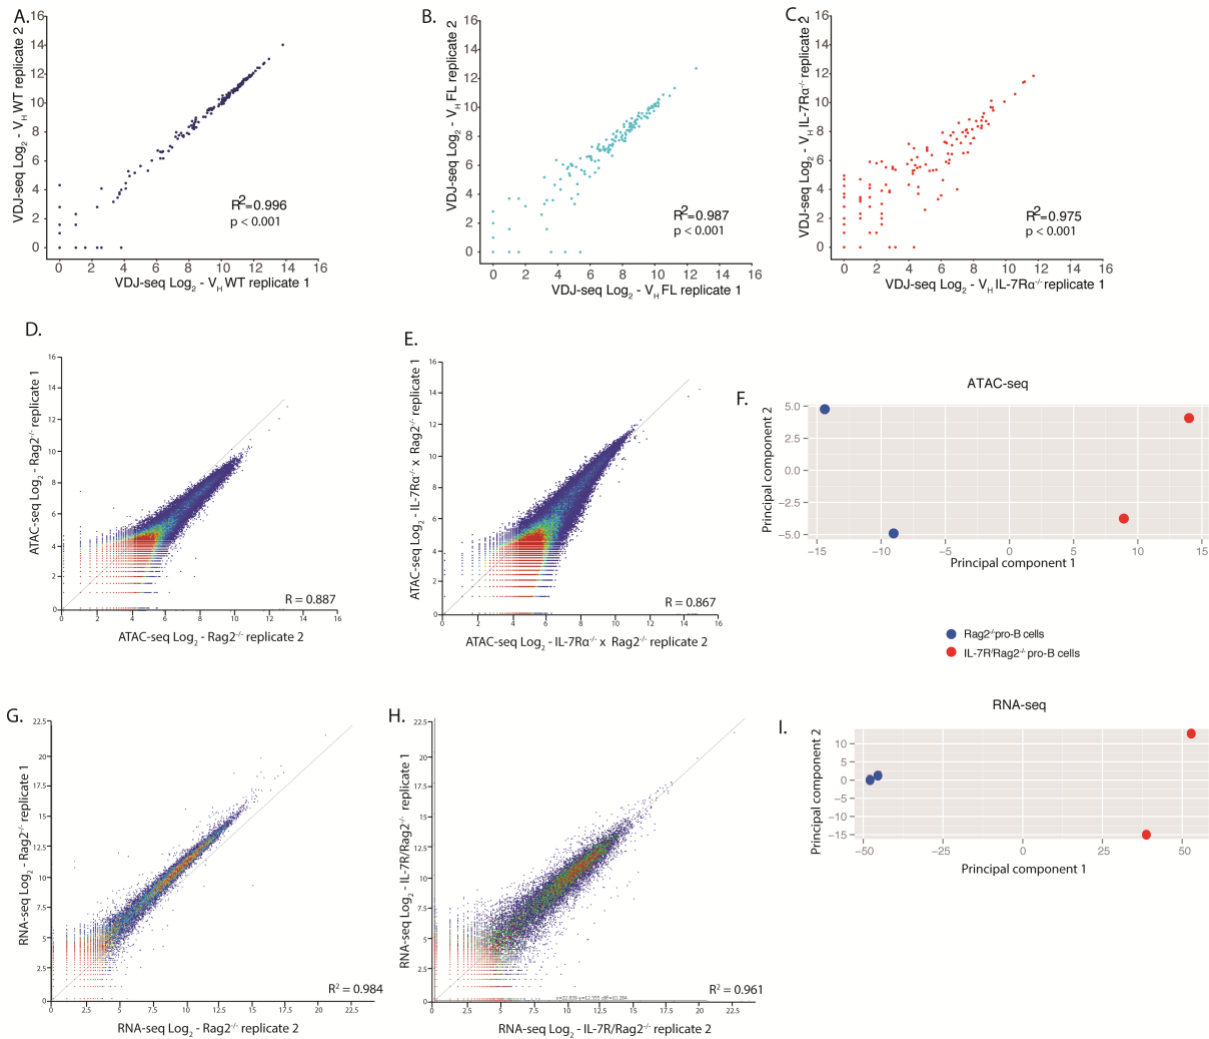

**S1: Replicate VDJ-seq, ATAC-seq and RNA-seq libraries are highly correlated.** Related to Figure 1 (panels A-C), 2 (panels A-C) and 3 (panels D-F and G-I).

**A-C.** Scatterplot of VDJ-seq read counts ( $\text{log}_2$  transformed) of  $V_H$  genes in two **A.** WT, **B.** FL and **C.** IL-7R $\alpha^{-/-}$  pro-B cell biological replicate datasets.

**D-F.** ATAC-seq read peaks were identified with MACS peak caller in Rag2 $^{-/-}$  and IL-7R $\alpha^{-/-}$ /Rag2 $^{-/-}$  genotypes. Reads were quantified for peak probes for each biological replicate separately for **D.** Rag2 $^{-/-}$  (Pearson's correlation  $R = 0.887$ ) and **E.** IL-7R $\alpha^{-/-}$ /Rag2 $^{-/-}$  ( $R = 0.867$ ) pro-B cell libraries. **F.** Principal component analysis shows clustering of each genotype. Principal components are calculated based on the regularized-logarithm transformation of read counts per gene and using the R package `pcaMethods`. Analysis done using DESeq2 package.

**G-I.** RNA-seq reads were quantified over all genes for each biological replicate for **G.** Rag2 $^{-/-}$  and **H.** IL-7R $\alpha^{-/-}$ /Rag2 $^{-/-}$  pro-B cell libraries. **I.** Principal component analysis shows clustering of each genotype, calculated as for **F.** above.

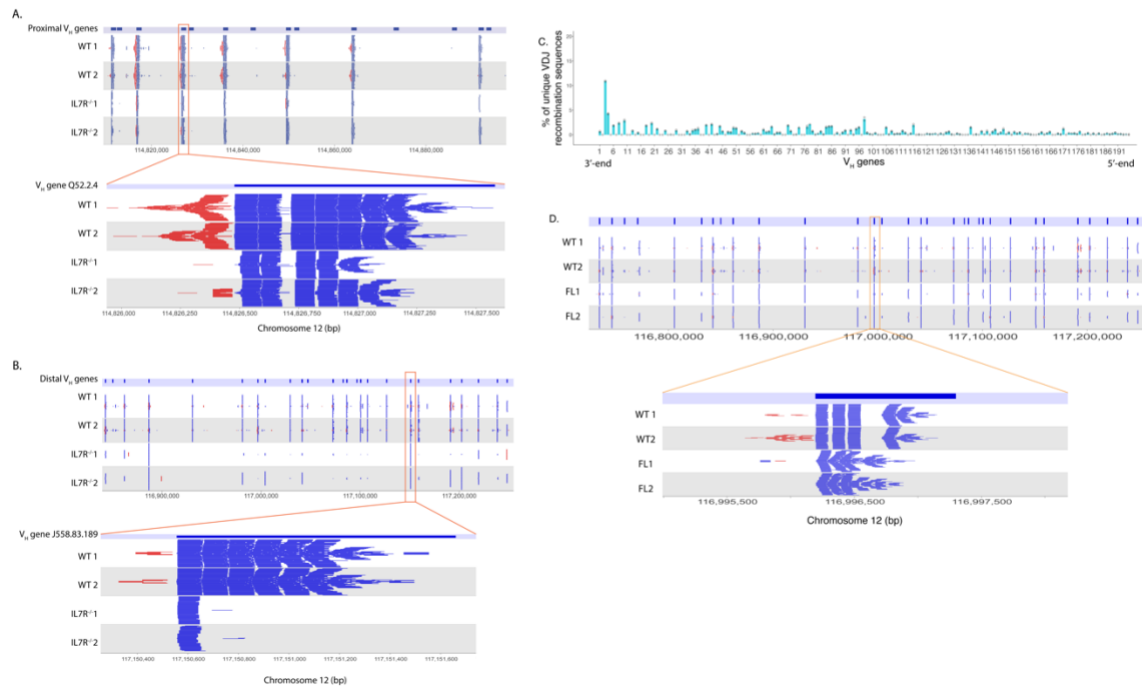

**S2: VDJ-seq read depth view over the Igh V region.** Related to Figure 1 and 2. Genome browser view of raw reads for each replicate WT and IL-7R $\alpha^{-/-}$  VDJ-seq library over the **A.** proximal  $V_H$  gene region ( $V_H$  genes in dark blue, starting with 7183.1pg.1 and 7183.8pg.14 as the most right) with a zoomed in view of Q52.2.4; and of the **B.** distal  $V_H$  gene region (the most left  $V_H$  genes represents J558.71pg.172 and the most right is J558.89pg.195) with a zoomed in view of J558.83.189. Due to the low number of cells in IL-7R $\alpha^{-/-}$  BM, VDJ-seq libraries were generated with approximately 6-fold less starting material than WT libraries, resulting in reduced numbers of raw reads (S Table 1). Nevertheless, this amount of starting material does not compromise detection of the wide dynamic range of frequency of VDJ and DJ recombined sequences (Chovanec et al., 2018). Blue reads = reverse, red reads = forward. Only correctly orientated (reverse) reads were quantified for VDJ-seq analysis.

**C.** Recombination frequencies of the 195  $V_H$  genes measured by VDJ-seq, for FL pro-B cells from 15.5 day old wild-type mice (50 embryos per replicate). Two replicates are shown as open circles. Reverse-strand reads were quantified for each  $V_H$  gene and shown as a percentage of total number of reads quantified. For list of  $V_H$  genes see S Table 1. **D.** Genome browser view of raw reads for each replicate WT and FL VDJ-seq library over the distal  $V_H$  gene region (the most left  $V_H$  genes represents J558.66.165 and the most right is J558.89pg.195) with a zoomed in view of J558.75.177. Each WT and FL replicate is shown separately. For read depth mapped to each Igh region see S Table 1.

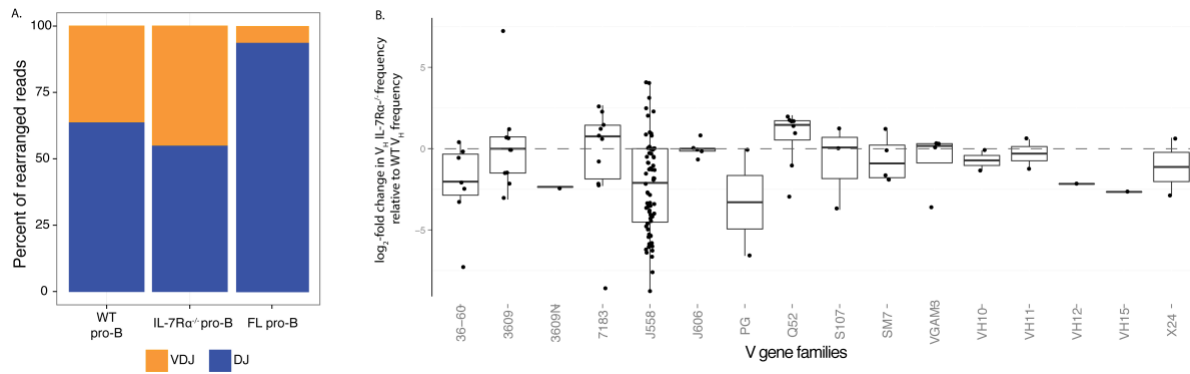

### S3: DJ<sub>H</sub>-VDJ<sub>H</sub> ratio and individual V<sub>H</sub> gene family usage. Related to Figure 1 and 2

**A.** Proportion of DJ<sub>H</sub> and VDJ<sub>H</sub> sequences in each cell type. The number of reads in the correct orientation was calculated over the D<sub>H</sub> and V<sub>H</sub> regions, and is shown as a percentage of total VDJ-seq reads in the correct orientation (mean of two replicates). **B.** VDJ-seq values of each V<sub>H</sub> gene grouped in families. The average of two WT and two IL-7R $\alpha^{-/-}$  VDJ-seq replicates was calculated for each V<sub>H</sub> gene. To display changes between WT and IL-7R-modified model frequencies, V<sub>H</sub> frequencies for each model were divided with the WT mean value and log<sub>2</sub>-transformed for comparison between models. Log<sub>2</sub> values for each gene were grouped by gene family.

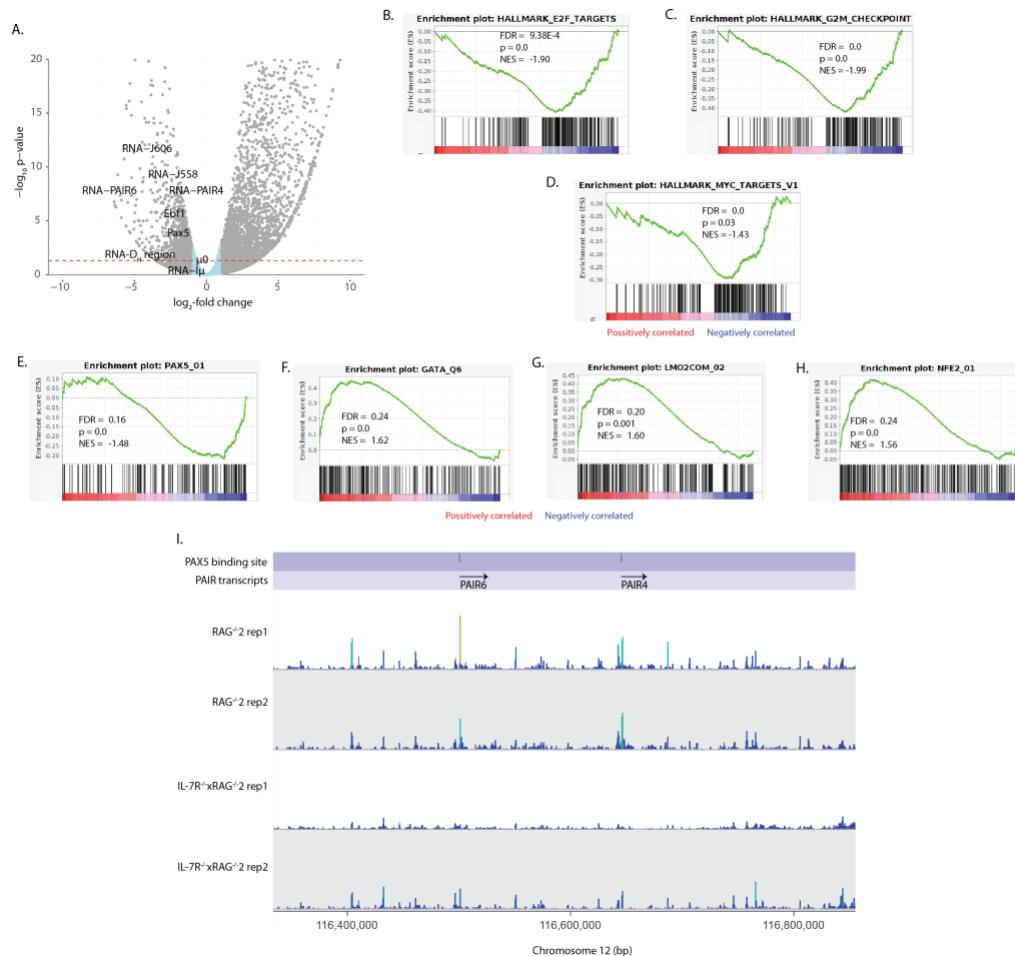

**S4: Transcriptional changes in IL-7Rα/Rag2<sup>-/-</sup> pro-B cell libraries relative to Rag2<sup>-/-</sup>.** Related to Figure 4. **A.** Volcano plot showing genome-wide RNA-seq data. Grey dots are genes that are differentially expressed > 2-fold (in blue < 2-fold) in IL-7Rα<sup>-/-</sup>/Rag2<sup>-/-</sup> compared with Rag2<sup>-/-</sup> libraries; dashed red line shows where  $p = 0.05$ . Transcripts of interest are tagged by name. Out of 4,793 differentially expressed genes in IL-7Rα/Rag2<sup>-/-</sup> pro-B compared with Rag2<sup>-/-</sup> pro-B cells, 3,780 genes were upregulated, while 1,013 genes were downregulated.

**B-D.** Gene set enrichment plot for **B.** E2F, **C.** G2M and **D.** MYC pathway target genes from the hallmark gene sets. Green line = enrichment score. FDR, false discovery rate;  $p$ , p-value; NES, normalized enrichment score.

**E-H: Transcriptional profiles for lineage-specific TF in IL-7Rα<sup>-/-</sup>/Rag2<sup>-/-</sup> pro-B cell.** Gene set enrichment plot for **E.** PAX5, **F.** GATA, **G.** LMO2 and **H.** NFE2 pathway target genes from the transcription factor targets/regulatory target gene sets. Green line = enrichment score. FDR, false discovery rate;  $p$ , p-value; NES, normalized enrichment score.

**I: PAIR4 and PAIR6 PAX5 binding sites have decreased accessibility in IL-7Rα<sup>-/-</sup>Rag2<sup>-/-</sup> cells.** ATAC-seq reads for Rag2<sup>-/-</sup> and IL-7Rα<sup>-/-</sup>Rag2<sup>-/-</sup> were quantified per 500 bp bins along the Igh locus and normalised by reads per million in Seqmonk. Height and colour of each bar represents relative number of reads over each probe: high orange bars have more reads than short blue bars. Each track was generated from each ATAC-seq library replicate. Purple tracks represent the location of PAX5 binding sites (top) and the location of PAIR4 and PAIR6 transcripts (black arrows, bottom).

### Differentially expressed genes

| Gene    | Rag2 <sup>-/-</sup> mean | IL-7R $\alpha$ /Rag2 <sup>-/-</sup> mean | log2 FoldChange | p-adj    |
|---------|--------------------------|------------------------------------------|-----------------|----------|
| Ebf1    | 198467.7                 | 31632.21                                 | -2.57           | 2.79E-07 |
| Pax5    | 22013.66                 | 5049.33                                  | -2.05           | 5.39E-04 |
| Flt3    | 371.14                   | 2680.54                                  | 2.8             | 1.31E-14 |
| Irf8    | 1727.72                  | 7817.74                                  | 2.15            | 1.34E-09 |
| Ikzf3   | 453.74                   | 2896.93                                  | 2.58            | 6.89E-06 |
| Lef1    | 50047.29                 | 7152.81                                  | -2.69           | 1.39E-05 |
| Foxo1   | 19360.34                 | 5176.08                                  | -1.86           | 2.37E-05 |
| Cd79a   | 36517.38                 | 5427.5                                   | -2.6            | 2.64E-04 |
| Rag1    | 24672.56                 | 4710.95                                  | -2.26           | 2.37E-03 |
| Smarca4 | 94899.66                 | 25252.66                                 | -1.84           | 3.19E-03 |
| Ezh2    | 21004.9                  | 8795.46                                  | -1.23           | 3.77E-03 |
| Myb     | 29838.38                 | 16868.3                                  | -0.8            | 2.41E-01 |
| Irf4    | 5144.04                  | 2515.98                                  | -0.98           | 3.14E-01 |
| Pdcd1   | 0                        | 2.37                                     | 0.86            | 7.68E-01 |

### Pax5 Igh

| Gene           | base  | log2Fold | stat   | pvalue   | padj  | RAG2ko | RAG2ko | IL7RxRAG | IL7RxRAG | Start     | End       |
|----------------|-------|----------|--------|----------|-------|--------|--------|----------|----------|-----------|-----------|
|                | Mean  | Change   |        |          |       | rep 1  | rep 2  | rep 1    | rep 2    |           |           |
| PAX5_peak_4991 | 58.65 | -1.607   | -3.907 | 9.34E-05 | 0.003 | 104.98 | 71.196 | 21.862   | 36.603   | 116500485 | 116500825 |
| PAX5_peak_4995 | 47.76 | -1.757   | -3.892 | 9.93E-05 | 0.003 | 65.817 | 81.8   | 13.991   | 29.461   | 116645504 | 116645995 |
| PAX5_peak_4951 | 57.82 | -1.249   | -3.209 | 0.001    | 0.018 | 94.144 | 68.167 | 31.481   | 37.496   | 115420792 | 115421430 |
| PAX5_peak_4980 | 80.22 | -0.967   | -2.937 | 0.003    | 0.034 | 109.14 | 103.01 | 50.719   | 58.029   | 116261760 | 116262315 |
| PAX5_peak_4935 | 78.21 | -1.018   | -2.879 | 0.004    | 0.038 | 128.3  | 80.285 | 51.594   | 52.673   | 114559170 | 114559811 |
| PAX5_peak_4962 | 55.66 | -1.098   | -2.689 | 0.007    | 0.056 | 94.977 | 56.048 | 32.355   | 39.281   | 115783152 | 115783717 |
| PAX5_peak_4959 | 34.77 | -1.226   | -2.557 | 0.01     | 0.073 | 47.488 | 49.989 | 16.615   | 24.997   | 115731781 | 115732333 |
| PAX5_peak_4994 | 20.89 | -1.335   | -2.214 | 0.026    | 0.135 | 32.492 | 27.266 | 13.991   | 9.82     | 116642334 | 116642774 |
| PAX5_peak_5004 | 26.69 | -1.164   | -2.174 | 0.029    | 0.143 | 31.659 | 42.415 | 15.74    | 16.962   | 116893825 | 116894359 |
| PAX5_peak_4997 | 23.16 | -1.215   | -2.074 | 0.038    | 0.169 | 41.656 | 22.722 | 13.991   | 14.284   | 116686368 | 116686763 |
| PAX5_peak_4985 | 39.07 | -0.908   | -2.014 | 0.044    | 0.185 | 59.152 | 42.415 | 28.857   | 25.89    | 116403612 | 116404154 |
| PAX5_peak_4946 | 27.56 | -0.902   | -1.696 | 0.089    | 0.289 | 44.156 | 27.266 | 20.987   | 17.855   | 115232421 | 115232908 |
| PAX5_peak_4965 | 51.75 | -0.66    | -1.686 | 0.091    | 0.293 | 67.484 | 59.078 | 37.602   | 42.852   | 115848009 | 115848418 |
| PAX5_peak_4961 | 33.38 | -0.608   | -1.255 | 0.209    | 0.472 | 42.49  | 37.87  | 32.355   | 20.533   | 115751308 | 115751839 |
| PAX5_peak_4977 | 17.15 | 0.836    | 1.219  | 0.222    | 0.491 | 12.497 | 12.118 | 30.606   | 13.391   | 116229108 | 116229562 |
| PAX5_peak_5010 | 31.94 | 0.614    | 1.219  | 0.222    | 0.491 | 27.493 | 22.722 | 48.096   | 29.461   | 117046284 | 117046584 |
| PAX5_peak_4967 | 20.07 | 0.741    | 1.114  | 0.265    | 0.539 | 21.661 | 7.5741 | 34.104   | 16.962   | 115884627 | 115885044 |
| PAX5_peak_4992 | 23.59 | -0.546   | -0.959 | 0.337    | 0.611 | 35.824 | 19.692 | 19.238   | 19.64    | 116550165 | 116550638 |
| PAX5_peak_4973 | 18.22 | -0.585   | -0.935 | 0.349    | 0.623 | 22.494 | 21.207 | 12.242   | 16.962   | 116042685 | 116042985 |

|                |       |        |        |       |       |        |        |         |        |           |           |
|----------------|-------|--------|--------|-------|-------|--------|--------|---------|--------|-----------|-----------|
| PAX5_peak_4958 | 22.84 | -0.53  | -0.929 | 0.352 | 0.626 | 22.494 | 31.811 | 20.987  | 16.069 | 115707103 | 115707635 |
| PAX5_peak_4953 | 15.15 | -0.583 | -0.826 | 0.408 | 0.671 | 12.497 | 24.237 | 9.619   | 14.284 | 115511658 | 115512198 |
| PAX5_peak_5016 | 20.48 | -0.497 | -0.819 | 0.412 | 0.675 | 30.826 | 16.663 | 18.364  | 16.069 | 117238104 | 117238447 |
| PAX5_peak_4976 | 43.69 | -0.349 | -0.796 | 0.425 | 0.687 | 36.658 | 62.107 | 36.728  | 39.281 | 116219764 | 116220117 |
| PAX5_peak_4933 | 74.42 | -0.249 | -0.739 | 0.459 | 0.713 | 79.981 | 81.8   | 74.331  | 61.6   | 114466306 | 114466863 |
| PAX5_peak_4998 | 19.18 | 0.423  | 0.689  | 0.49  | 0.736 | 17.495 | 15.148 | 25.359  | 18.748 | 116745638 | 116746002 |
| PAX5_peak_5003 | 58.35 | 0.265  | 0.689  | 0.491 | 0.736 | 43.323 | 63.622 | 57.7158 | 68.742 | 116885865 | 116886170 |
| PAX5_peak_4999 | 23.53 | -0.388 | -0.669 | 0.503 | 0.744 | 23.327 | 30.296 | 27.108  | 13.391 | 116757190 | 116757574 |
| PAX5_peak_4966 | 47.54 | 0.258  | 0.628  | 0.53  | 0.765 | 39.99  | 46.959 | 58.59   | 44.638 | 115853579 | 115854300 |
| PAX5_peak_4987 | 31.18 | 0.282  | 0.574  | 0.565 | 0.787 | 31.659 | 24.237 | 37.602  | 31.246 | 116431681 | 116432096 |
| PAX5_peak_5014 | 15.78 | 0.343  | 0.514  | 0.606 | 0.813 | 14.163 | 13.633 | 18.364  | 16.962 | 117190501 | 117190981 |
| PAX5_peak_5007 | 22.97 | 0.287  | 0.476  | 0.634 | 0.83  | 17.495 | 24.237 | 34.979  | 15.176 | 116929919 | 116930219 |
| PAX5_peak_4934 | 34.32 | 0.205  | 0.402  | 0.687 | 0.86  | 41.656 | 21.207 | 27.108  | 47.316 | 114552752 | 114553205 |
| PAX5_peak_5000 | 29.87 | -0.11  | -0.219 | 0.826 | 0.932 | 31.659 | 30.296 | 23.611  | 33.924 | 116765364 | 116765786 |
| PAX5_peak_4990 | 21.76 | 0.1    | 0.176  | 0.859 | 0.946 | 20.828 | 21.207 | 23.611  | 21.426 | 116496004 | 116496536 |

## ATAC-seq Igh

| Gene                    | base  | log2Fold | stat   | pvalue   | padj  | RAG2ko  | RAG2ko  | IL7RxRAG | IL7RxRAG |
|-------------------------|-------|----------|--------|----------|-------|---------|---------|----------|----------|
|                         | Mean  | Change   |        |          |       | rep 1   | rep 2   | rep 1    | rep 2    |
| 12_116500351..116501400 | 58.65 | -1.607   | -3.907 | 9.34E-05 | 0.002 | 104.975 | 71.196  | 21.862   | 36.603   |
| 12_116645251..116646300 | 47.76 | -1.757   | -3.892 | 9.93E-05 | 0.002 | 65.817  | 81.8    | 13.991   | 29.461   |
| 12_115420951..115421400 | 57.82 | -1.249   | -3.209 | 0.001    | 0.017 | 94.144  | 68.167  | 31.481   | 37.496   |
| 12_116261701..116262450 | 80.22 | -0.967   | -2.937 | 0.003    | 0.033 | 109.141 | 103.007 | 50.719   | 58.029   |
| 12_114559051..114559800 | 78.21 | -1.018   | -2.879 | 0.004    | 0.038 | 128.303 | 80.285  | 51.594   | 52.673   |
| 12_115783051..115783650 | 55.66 | -1.098   | -2.689 | 0.007    | 0.056 | 94.977  | 56.048  | 32.355   | 39.281   |
| 12_115731751..115732350 | 34.77 | -1.226   | -2.557 | 0.01     | 0.072 | 47.488  | 49.989  | 16.615   | 24.997   |
| 12_116893801..116894400 | 26.69 | -1.164   | -2.174 | 0.029    | 0.143 | 31.659  | 42.415  | 15.74    | 16.962   |
| 12_116403751..116404050 | 39.07 | -0.908   | -2.015 | 0.043    | 0.184 | 59.152  | 42.415  | 28.857   | 25.89    |
| 12_115847401..115848000 | 51.75 | -0.661   | -1.686 | 0.091    | 0.293 | 67.484  | 59.078  | 37.602   | 42.852   |
| 12_115751401..115751850 | 33.31 | -0.609   | -1.255 | 0.209    | 0.477 | 42.49   | 37.87   | 32.355   | 20.533   |
| 12_115825501..115825800 | 14.5  | 0.894    | 1.204  | 0.228    | 0.498 | 5.831   | 15.148  | 21.862   | 15.176   |
| 12_115850101..115850700 | 31.22 | 0.594    | 1.176  | 0.239    | 0.512 | 30.826  | 18.177  | 41.975   | 33.924   |
| 12_115884601..115885050 | 20.07 | 0.741    | 1.114  | 0.265    | 0.538 | 21.661  | 7.574   | 34.104   | 16.962   |
| 12_116550151..116550450 | 23.59 | -0.546   | -0.959 | 0.337    | 0.611 | 35.824  | 19.692  | 19.238   | 19.64    |
| 12_115707001..115707600 | 22.84 | -0.53    | -0.929 | 0.352    | 0.626 | 22.494  | 31.811  | 20.987   | 16.069   |
| 12_116219551..116220450 | 43.69 | -0.349   | -0.796 | 0.425    | 0.689 | 36.658  | 62.107  | 36.728   | 39.281   |
| 12_115617001..115617600 | 38.55 | -0.33    | -0.705 | 0.48     | 0.728 | 49.155  | 36.355  | 43.724   | 24.997   |
| 12_116885701..116886450 | 58.35 | 0.265    | 0.689  | 0.49     | 0.735 | 43.323  | 63.622  | 57.715   | 68.742   |
| 12_116757301..116757600 | 23.53 | -0.389   | -0.669 | 0.503    | 0.744 | 23.327  | 30.296  | 27.108   | 13.391   |
| 12_115853401..115854450 | 47.54 | 0.258    | 0.628  | 0.53     | 0.764 | 39.99   | 46.959  | 58.59    | 44.638   |
| 12_116431651..116432250 | 31.18 | 0.282    | 0.5746 | 0.565    | 0.786 | 31.659  | 24.237  | 37.602   | 31.246   |
| 12_116929951..116930250 | 22.97 | 0.287    | 0.476  | 0.634    | 0.83  | 17.495  | 24.237  | 34.979   | 15.176   |
| 12_116765401..116765850 | 29.87 | -0.11    | -0.219 | 0.826    | 0.931 | 31.659  | 30.296  | 23.611   | 33.924   |

**S Table 3: EBF1, PAX5 and their key targets are differentially expressed and accessible in IL-7R $\alpha$ <sup>-/-</sup> Rag2<sup>-/-</sup> relative to Rag2<sup>-/-</sup> pro-B cells.** Related to Figure 4 and Figure S4. **Differentially expressed genes.** RNA-seq raw reads were quantified over all genes, separately for each of two replicates. The adjusted mean for each probe, as well as the log<sub>2</sub>-fold change and adjusted p-value in the IL-7R $\alpha$ <sup>-/-</sup> Rag2<sup>-/-</sup> relative to Rag2<sup>-/-</sup> samples was calculated by DESeq2. **Pax5 Igh. Pax5 binding sites show changes in accessibility in IL-7R $\alpha$ <sup>-/-</sup> Rag2<sup>-/-</sup> relative to Rag2<sup>-/-</sup> pro-B cells.** ATAC-seq raw reads were quantified over PAX5 binding sites (only PAX5 binding sites over the Igh locus are shown) for each of two replicates. The adjusted mean for each probe, as well as the log<sub>2</sub>-fold change and adjusted p-value in the IL-7R $\alpha$ <sup>-/-</sup> Rag2<sup>-/-</sup> relative to Rag2<sup>-/-</sup> samples was calculated by DESeq2. **ATAC-seq Igh.** Location of 24 accessible sites in Igh.
